# Supplementary material for: iNovo479: Metabolic Modeling Provides a Roadmap to Optimize Bioproduct Yield from Deconstructed Lignin Aromatics by Novosphingobium aromaticivorans
Source: MDPI journal article supplement (doi:10.3390/metabo12040366), 2022-04-18
Supplement: s1 [file s1]

# iNovo479: Metabolic Modeling Provides a Roadmap to Optimize Bioproduct Yield from deconstructed Lignin Aromatics by *Novosphingobium aromaticivorans*

Alexandra M. Linz, Yanjun Ma, Samuel Scholz, Daniel R. Noguera and Timothy J. Donohue

## Supplemental information

**Table S1.** Measured biomass composition of *N. aromaticivorans*

| Characteristic | Value <sup>1</sup> |
|----------------|--------------------|
| DNA            | 1.7%               |
| RNA            | 6.6%               |
| Protein        | 60.0%              |
| Phospholipids  | 7.3%               |

<sup>1</sup> Percent of total biomass

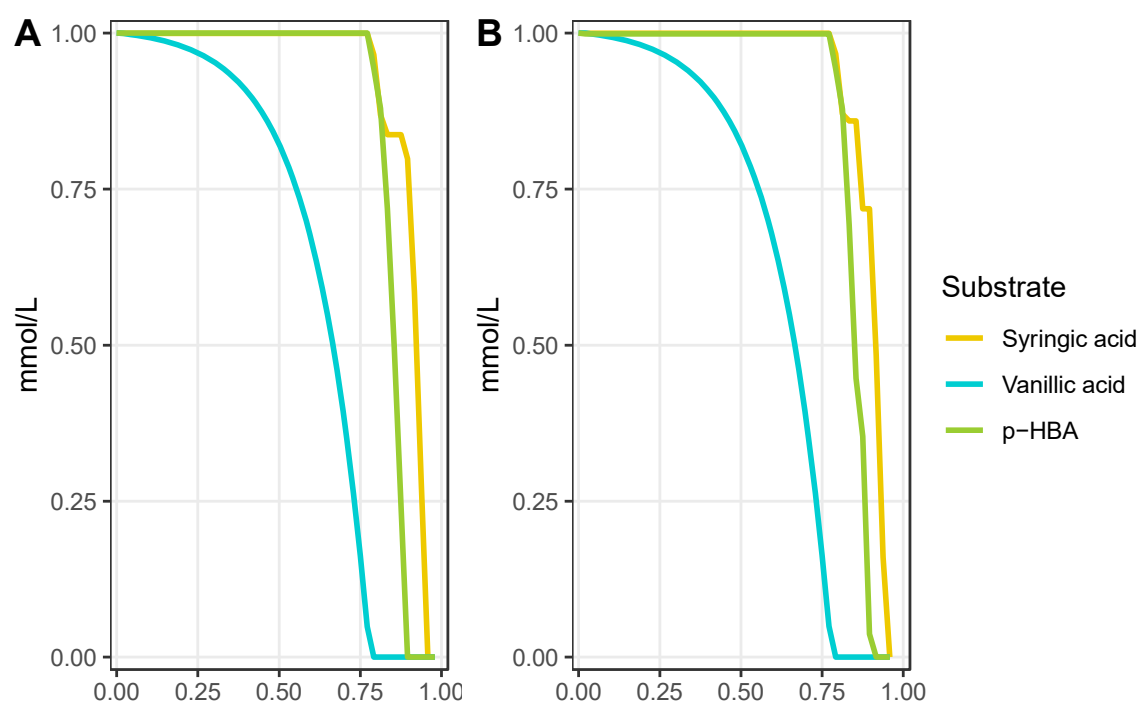

**Figure S1.** Co-metabolism of SA, VA, and p-HBA by versions of iNovo479 with a hypothetical, non-THF dependent demethylation step (Panel A) and with a VanAB-like demethylation step (Panel B). Each organic substrate was provided at 1 mmol/L.

**Table S2. Native vs. hypothetical vs. *P. putida* demethylation reactions in iNovo479**

| Model version    | Reaction ID             | Reversible | Reaction Name                                           | Reaction                                                                         |
|------------------|-------------------------|------------|---------------------------------------------------------|----------------------------------------------------------------------------------|
| native           | A007                    | NO         | Vanillic acid demethylation 1                           | Vanillic acid + THF => 5-Methyltetrahydrofolate + PCA                            |
| native           | A008                    | NO         | Vanillic acid demethylation 2                           | 5-Methyltetrahydrofolate + NAD+ => NADH + 5,10-Methylenetetrahydrofolate + H+    |
| native           | R01220                  | YES        | 5,10-methylenetetrahydrofolate:NADP+ oxidoreductase     | 5,10-Methylenetetrahydrofolate + NADP+ <=> 5,10-Methenyltetrahydrofolate + NADPH |
| native           | R01655                  | YES        | 5,10-Methenyltetrahydrofolate 5-hydrolase (decyclizing) | 5,10-Methenyltetrahydrofolate + H2O <=> 10-Formyltetrahydrofolate + H+           |
| native           | R00944                  | NO         | 10-Formyltetrahydrofolate amidohydrolase                | 10-Formyltetrahydrofolate + H2O => formate + THF                                 |
| native           | A018                    | NO         | Syringic acid demethylation                             | Syringic acid + THF => 5-Methyltetrahydrofolate + 3-methylgallate                |
| hypothetical     | altA007 (replaces A007) | NO         | Hypothetical vanillic acid demethylation 1              | Vanillic acid + O2 => formate + PCA                                              |
| hypothetical     | altA018 (replaces A018) | NO         | Hypothetical syringic acid demethylation                | Syringic acid + O2 => formate + 3-methylgallate                                  |
| <i>P. putida</i> | ppA007 (replaces A007)  | NO         | <i>P. putida</i> vanillic acid demethylation            | Vanillic acid + NADH + O2 + H+ => NAD+ + H2O + formaldehyde + PCA                |
| <i>P. putida</i> | ppA018 (replaces A018)  | NO         | <i>P. putida</i> syringic acid demethylation            | Syringic acid + NADH + O2 + H+ => NAD+ + H2O + formaldehyde + 3-methylgallate    |

**Table S3.** Reactions added to iNovo479 to simulate engineered strains capable of producing non-native chemicals.

| Reaction ID | Reversibility | Name                                                    | Bioproduct    | Reaction                                                                     |
|-------------|---------------|---------------------------------------------------------|---------------|------------------------------------------------------------------------------|
| engR01704   | Reversible    | Palmitaldehyde:NAD+ oxidoreductase                      | 1-hexadecanol | Hexadecanal + NAD+ + H <sub>2</sub> O <=> Hexadecanoic acid + NADH + H+      |
| engR02462   | Reversible    | Hexadecanol:NAD+ oxidoreductase                         | 1-hexadecanol | 1-Hexadecanol + NAD+ <=> Hexadecanal + NADH + H+                             |
| engR01976   | Reversible    | (S)-3-Hydroxybutanoyl-CoA:NADP+ oxidoreductase          | Butanoic acid | (S)-3-Hydroxybutanoyl-CoA + NADP+ <=> Acetoacetyl-CoA + NADPH + H+           |
| engR03026   | Reversible    | (S)-3-hydroxybutanoyl-CoA hydro-lyase                   | Butanoic acid | (S)-3-Hydroxybutanoyl-CoA <=> Crotonoyl-CoA + H <sub>2</sub> O               |
| engR01171   | Reversible    | butanoyl-CoA:NAD+ trans-2-oxidoreductase                | Butanoic acid | Butanoyl-CoA + NAD+ <=> Crotonoyl-CoA + NADH + H+                            |
| engR01179   | Reversible    | butanoyl-CoA:acetate CoA-transferase                    | Butanoic acid | Butanoyl-CoA + Acetate <=> Butanoic acid + Acetyl-CoA                        |
| engR00449   | Irreversible  | L-lysine:oxygen 2-oxidoreductase (decarboxylating)      | Glutarate     | L-Lysine + Oxygen => 5-Aminopentanamide + CO <sub>2</sub> + H <sub>2</sub> O |
| engR02273   | Irreversible  | 5-aminopentanamide amidohydrolase                       | Glutarate     | 5-Aminopentanamide + H <sub>2</sub> O => 5-Aminopentanoate + Ammonia         |
| engR02274   | Reversible    | 5-aminopentanoate:2-oxoglutarate aminotransferase       | Glutarate     | 5-Aminopentanoate + 2-Oxoglutarate <=> 5-Oxopentanoate + L-Glutamate         |
| engR02401   | Reversible    | glutarate-semialdehyde:NAD+ oxidoreductase              | Glutarate     | 5-Oxopentanoate + NAD+ + H <sub>2</sub> O <=> Glutarate + NADH + H+          |
| engR00841   | Irreversible  | sn-glycerol-3-phosphate phosphohydrolase                | Glycerol      | sn-Glycerol 3-phosphate + H <sub>2</sub> O => Glycerol + Orthophosphate      |
| engR00728   | Reversible    | L-tyrosine phenol-lyase (deaminating; pyruvate-forming) | Phenol        | L-Tyrosine + H <sub>2</sub> O <=> Phenol + Pyruvate + Ammonia                |

**Table S4.** Kinetic constants used to simulate maximum allowed substrate uptake rates

|                                   | Half-saturation<br>constant<br>( $K_s$ )(mmol/L) | Substrate velocity<br>( $V_{max}$ )(mmol/min) | Inhibition constant<br>( $K_i$ )(mmol/L) |
|-----------------------------------|--------------------------------------------------|-----------------------------------------------|------------------------------------------|
| Non-aromatic carbon<br>substrates | 0.139                                            | 0.500                                         | 0.139                                    |
| S-type aromatics                  | 0.050                                            | 0.582                                         | 0.050                                    |
| H-type aromatics                  | 0.050                                            | 0.902                                         | 0.050                                    |
| G-type aromatics                  | 0.100                                            | 0.569                                         | 0.100                                    |
| Ammonia                           | 0.100                                            | 0.500                                         | 0.100                                    |
| Phosphate                         | 0.002                                            | 0.060                                         | 0.100                                    |
| Sulfate                           | 0.003                                            | 0.002                                         | 0.100                                    |
| Iron                              | 0.003                                            | 0.002                                         | 0.100                                    |
